# Supplementary material for: Adherence and Psychosocial Well-Being During Pandemic-Associated Pre-deployment Quarantine
Source: Frontiers journal article supplement (doi:10.3389/fpubh.2021.802180), 2021-12-22
Supplement: Table_12.pdf [file Table_12.pdf]

**Table 12:** Relationship between quarantine adherence, mental health and quarantine-related psychosocial factors assessed at the beginning of pre-deployment quarantine  
(All item values of the quarantine-related factors were z-standardized.)

|                                          |   | Adherence at the beginning of quarantine | Adherence at the end of quarantine | Mini_SCL at the beginning of quarantine | Mini_SCL at the end of quarantine |
|------------------------------------------|---|------------------------------------------|------------------------------------|-----------------------------------------|-----------------------------------|
| Adherence at the beginning of quarantine | r | 1                                        | .774                               | -.170                                   | -.186                             |
|                                          | p |                                          | .000                               | .000                                    | .000                              |
|                                          | n | 597                                      | 592                                | 590                                     | 585                               |
| Adherence at the end of quarantine       | r | .774                                     | 1                                  | -.155                                   | -.303                             |
|                                          | p | .000                                     |                                    | .000                                    | .000                              |
|                                          | n | 592                                      | 598                                | 586                                     | 588                               |
| Mini_SCL at the beginning of quarantine  | r | -.170                                    | -.155                              | 1                                       | .417                              |
|                                          | p | .000                                     | .000                               |                                         | .000                              |
|                                          | n | 590                                      | 586                                | 591                                     | 579                               |
| Mini_SCL at the end of quarantine        | r | -.186                                    | -.303                              | .417                                    | 1                                 |
|                                          | p | .000                                     | .000                               | .000                                    |                                   |
|                                          | n | 585                                      | 588                                | 579                                     | 591                               |
| <sup>1</sup> Info Covid                  | r | .276                                     | .294                               | -.095                                   | -.101                             |
|                                          | p | .000                                     | .000                               | .010                                    | .007                              |
|                                          | n | 593                                      | 588                                | 588                                     | 581                               |
| <sup>2</sup> Clear Protocol              | r | .364                                     | .376                               | -.140                                   | -.192                             |
|                                          | p | .000                                     | .000                               | .000                                    | .000                              |
|                                          | n | 593                                      | 588                                | 588                                     | 581                               |
| <sup>3</sup> Social norms                | r | .604                                     | .599                               | -.181                                   | -.155                             |
|                                          | p | .000                                     | .000                               | .000                                    | .000                              |

|                                            |   |      |      |       |       |
|--------------------------------------------|---|------|------|-------|-------|
|                                            | n | 592  | 587  | 587   | 580   |
| <sup>4</sup> Stigma                        | r | .186 | .128 | -.137 | -.124 |
|                                            | p | .000 | .001 | .000  | .001  |
|                                            | n | 587  | 582  | 582   | 576   |
| <sup>5</sup> Covid risk                    | r | .299 | .242 | .071  | .031  |
|                                            | p | .000 | .000 | .043  | .228  |
|                                            | n | 594  | 589  | 590   | 582   |
| <sup>6</sup> Practicality                  | r | .348 | .384 | -.211 | -.180 |
|                                            | p | .000 | .000 | .000  | .000  |
|                                            | n | 587  | 582  | 581   | 576   |
| <sup>7</sup> Bonding need                  | r | .232 | .294 | -.273 | -.227 |
|                                            | p | .000 | .000 | .000  | .000  |
|                                            | n | 592  | 587  | 586   | 581   |
| <sup>8</sup> Boredom                       | r | .367 | .467 | -.050 | -.194 |
|                                            | p | .000 | .000 | .115  | .000  |
|                                            | n | 589  | 592  | 583   | 588   |
| <sup>9</sup> Effective-<br>ness Quarantine | r | .473 | .434 | -.146 | -.064 |
|                                            | p | .000 | .000 | .000  | .063  |
|                                            | n | 593  | 588  | 589   | 581   |
| <sup>10</sup> Financial disadvantage       | r | .096 | .123 | -.087 | -.101 |
|                                            | p | .010 | .001 | .017  | .007  |
|                                            | n | 593  | 588  | 587   | 581   |

\*p < .05, \*\*p < .01, \*\*\*p < .001

**Legend:**

Quarantine-related psychosocial variables

<sup>1</sup>InfoCovid: feeling well informed about Covid-19

<sup>2</sup>Clear Protocol: clear communication about the quarantine protocol (purpose, lengths, rules, etc.)

<sup>3</sup>Social norms: Positive social norms of relevant others towards the quarantine (family, partner, fellow soldiers)

<sup>4</sup>Stigma: perceived stigma due to the quarantine

<sup>5</sup>Covid risk: perceived risk by Covid-19 (self, family/partner, fellow soldiers, general)

<sup>6</sup>Practicality: being provided with everything needed during quarantine (daily necessities, food, medical support)

<sup>8</sup>Boredom: quarantine-related boredom

<sup>9</sup>Effectiveness Quarantine: perceived benefit/effectiveness of quarantine (to protect self, family, fellow soldiers, vulnerable people, prevent deaths)

<sup>10</sup>Financial disadvantage: financial disadvantages caused by quarantining (additional costs for child-care, etc.)
